# Supplementary material for: Fabrication and characterization of nanocomposite film made from a jackfruit filum polysaccharide incorporating TiO2nanoparticles by photocatalysis
Source: Royal Society of Chemistry journal article supplement (doi:10.1039/c6ra28648h), 2017-01-01
Supplement: c6ra28648h1.pdf [file c6ra28648h1.pdf]

## Supporting Information

### **Fabrication and characterization of nanocomposite film made from a Jackfruit filum polysaccharide incorporating TiO<sub>2</sub> nanoparticles by photocatalysis**

Bei Jin,<sup>†\*</sup> Xiangzhong Li,<sup>†</sup> Xiaosong Zhou, Xuan Xu, Hailin Jian, Mulan Li, Keqi

Guo, Jinmin Guan, Shanglong Yan

School of Chemistry and Chemical Engineering, Institute of Physical Chemistry, and  
Development Center for New Materials Engineering & Technology in Universities of  
Guangdong, Lingnan Normal University, Zhanjiang 524048, PR China.

\*Corresponding author: Tel/Fax: +86-759-3183205; E-mail: jinb@lingnan.edu.cn (B.  
Jin).

<sup>†</sup> These authors contributed equally to this work.

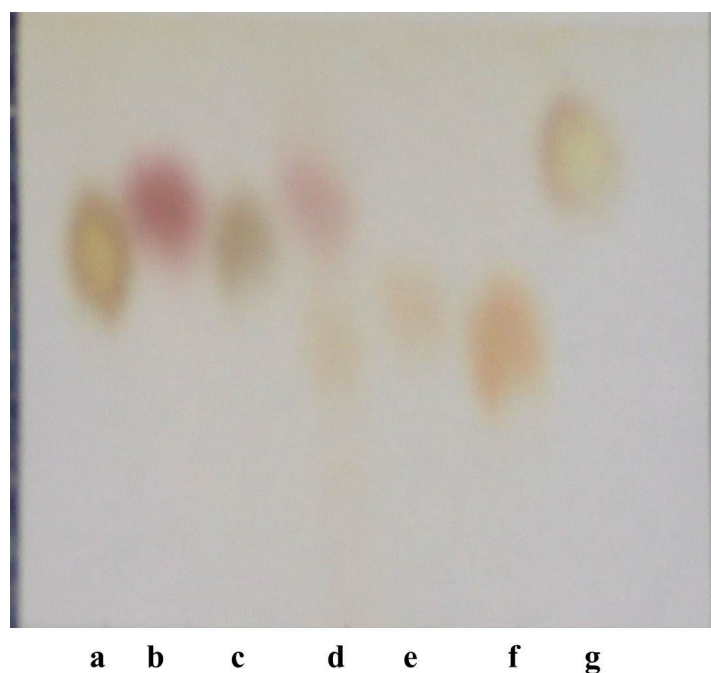

Fig. S1. Paper chromatography images of JFPS : (a)glucose; (b) arabinose; (c) rhamnose; (d) JFPS; (e) glucuronic acid; (f) galacturonic acid; (g) galactose.

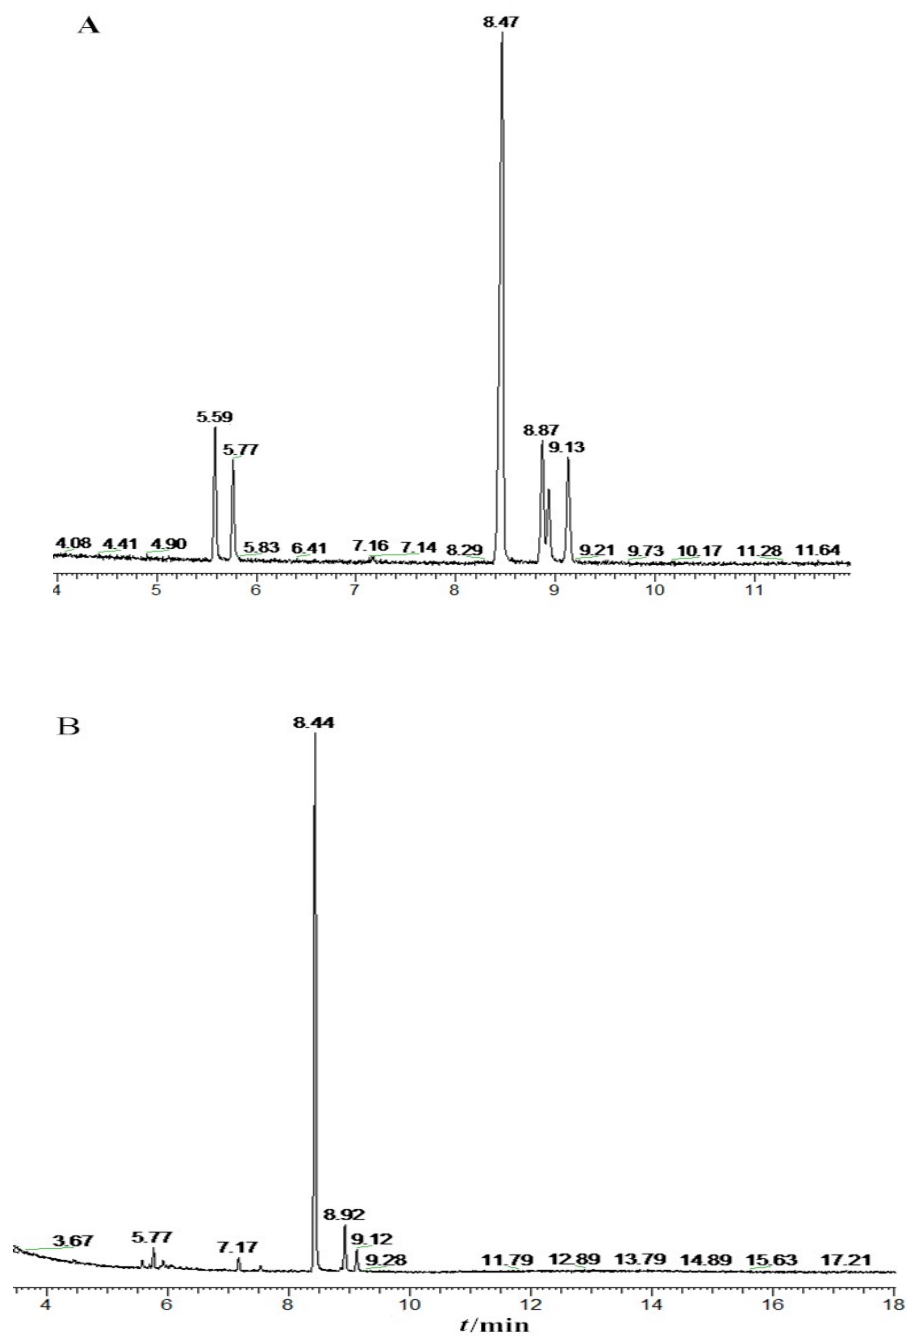

Fig. S2. Gas chromatographic maps of the neutral polysaccharide component of JFPS: (A-Reference standard\*; B- Jackfruit filum polysaccharide)

\*The retention time of rhamnose, arabinose, inositol, mannose, glucose and galactose were 5.59, 5.77, 8.47, 8.87, 8.96 and 9.13, respectively.
